# Supplementary material for: Solid-Liquid Phase Equilibria of the Ternary System (NaCl + CH3OH + H2O) at 298.15, 308.15, 318.15 K, and 0.1 MPa
Source: Hindawi journal article supplement (doi:10.1155/2018/4849639), 2018-12-02
Supplement: f1 [file 4849639.f1.docx]

**Solid-Liquid Phase Equilibria of the Ternary System (NaCl + CH3OH + H2O) at 298.15, 308.15, 318.15 K and 0.1 MPa**

**Jian SHI**1**, Jiayin HU1,*, Long LI**1**, Yafei GUO**1,2**, Xiaoping YU**1**, Tianlong DENG1,***

1 *Tianjin Key Laboratory of Marine Resources and Chemistry, College of Chemical Engineering and Materials Science, Tianjin University of Science and Technology , Tianjin 300457，PRC*；

*2 College of Chemistry and Materials Science, Northwest University, Xi’an, 710127, PRC*

Corresponding authors. E-mail address: [hujiayin@tust.edu.cn](mailto:hujiayin@tust.edu.cn) and [tldeng@tust.edu.cn](mailto:tldeng@tust.edu.cn)


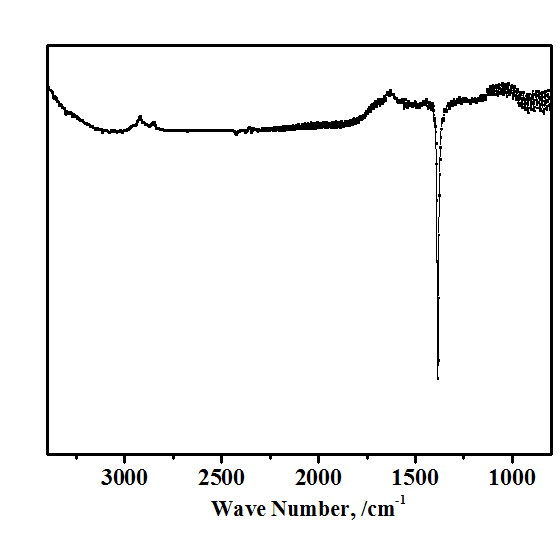


**Figure S1:** FT-IR spectra of NaCl we obtained from the equilibrium supernatant.

**Table S1: The *m*0, *m*1, *m*2, *m*W, *m*M we tested**

| No. | *m*0 | *m*1 | *m*2 | *m*W | *m*M |
| --- | --- | --- | --- | --- | --- |
| 298.15 K | | | | | |
| 1, A1 | 33.0603 | 55.5246 | 39.0064 | 100.6246 | 0.0000 |
| 2 | 33.9669 | 59.3586 | 39.7735 | 90.2212 | 10.4379 |
| 3 | 31.1722 | 57.0943 | 37.4659 | 95.0148 | 6.3521 |
| 4 | 20.5791 | 30.8564 | 22.5862 | 80.7413 | 20.2405 |
| 5 | 32.9696 | 55.1673 | 36.5894 | 71.1034 | 30.0178 |
| 6 | 32.3608 | 51.5528 | 34.8327 | 60.0199 | 40.3599 |
| 7 | 34.6089 | 54.7968 | 36.6512 | 51.4678 | 50.5416 |
| 8 | 32.3601 | 51.8172 | 33.8328 | 42.3037 | 60.4574 |
| 9 | 32.3597 | 50.2393 | 33.2628 | 31.8069 | 72.3999 |
| 10 | 35.3476 | 51.7263 | 35.8796 | 20.9176 | 81.8077 |
| 11 | 35.0782 | 53.7800 | 35.4644 | 10.3229 | 90.0706 |
| 12, B1 | 32.4527 | 47.7694 | 32.6615 | 0.0000 | 97.5120 |
| 308.15 K | | | | | |
| 1, A1 | 35.1425 | 67.1030 | 43.6539 | 100.0533 | 0.0000 |
| 2 | 35.0773 | 65.6010 | 42.6444 | 95.5527 | 5.4281 |
| 3 | 29.8927 | 58.0603 | 36.4301 | 90.4952 | 10.2340 |
| 4 | 37.9053 | 68.1573 | 43.9264 | 80.7417 | 19.9520 |
| 5 | 34.2034 | 58.9386 | 38.2856 | 70.8742 | 30.6198 |
| 6 | 34.9315 | 55.9875 | 37.7559 | 61.0967 | 40.5239 |
| 7 | 32.3589 | 53.2363 | 34.5243 | 51.0192 | 50.8386 |
| 8 | 35.0779 | 67.4038 | 37.4972 | 40.2328 | 61.6033 |
| 9 | 32.7594 | 67.6010 | 34.5939 | 31.0725 | 71.8466 |
| 10 | 29.9173 | 70.2166 | 31.2925 | 20.4745 | 80.3413 |
| 11 | 33.9674 | 77.3430 | 34.9021 | 10.5007 | 90.3452 |
| 12, B1 | 32.1484 | 65.9445 | 32.6107 | 0.0000 | 102.2022 |
| 318.15 K | | | | | |
| 1, A1 | 32.3541 | 64.2800 | 40.9109 | 100.5928 | 0.0000 |
| 2 | 35.0777 | 60.6656 | 41.4909 | 95.6039 | 5.2510 |
| 3 | 32.7600 | 62.1187 | 39.6631 | 90.6039 | 10.1321 |
| 4 | 33.2423 | 67.4819 | 40.1558 | 80.3597 | 20.1080 |
| 5 | 30.6464 | 61.0895 | 35.8115 | 70.4208 | 30.0624 |
| 6 | 32.3534 | 59.1140 | 36.0192 | 59.9874 | 40.0490 |
| 7 | 32.8718 | 59.2464 | 35.7049 | 49.9071 | 49.7244 |
| 8 | 30.4668 | 55.0005 | 32.4132 | 40.4241 | 60.2175 |
| 9 | 27.5552 | 47.6326 | 28.6584 | 30.4127 | 70.1303 |
| 10 | 29.1099 | 48.1385 | 29.8023 | 21.2435 | 80.1910 |
| 11 | 32.8715 | 55.7014 | 33.3685 | 10.4946 | 90.3276 |
| 12, B1 | 31.3919 | 69.1061 | 31.9116 | 0.0000 | 100.4479 |
